# Supplementary material for: Chitosan Nanoparticles-Preparation, Characterization and Their Combination with Ginkgo biloba Extract in Preliminary In Vitro Studies
Source: MDPI journal article supplement (doi:10.3390/molecules28134950), 2023-06-23

Table S1. Data for the rate of release of GBE from Ch(GB)NPs in water and in saline

| czas   | Nano water |          | Nano saline |          |        |       |     |
|--------|------------|----------|-------------|----------|--------|-------|-----|
|        | A          | c, µg/ml | A           | c, µg/ml |        |       |     |
| 5 min  | 0.0286     | 9.53     | 0.1013      | 33.77    | 0.1013 | 5     | 1.6 |
| 15 min | 0.0599     | 19.97    | 0.1270      | 42.33    | 0.1270 | 15    | 2.7 |
| 30 min | 0.0761     | 25.37    | 0.2197      | 73.23    | 0.2197 | 30    | 3.4 |
| 1h     | 0.0768     | 25.60    | 0.2139      | 71.30    | 0.2139 | 60    | 4.1 |
| 2h     | 0.0776     | 25.87    | 0.2094      | 69.80    | 0.1894 | 120   | 4.8 |
| 4h     | 0.0842     | 28.07    | 0.2170      | 72.33    | 0.1970 | 240   | 5.5 |
| 24h    | 0.0930     | 31.00    | 0.2580      | 86.00    | 0.2580 | 1440  | 7.3 |
| 96h    | 0.1310     | 43.67    | 0.2930      | 97.67    | 0.2930 | 5760  | 8.6 |
| 7d     | 0.1500     | 50.00    | 0.3180      | 106.00   | 0.3180 | 10080 | 9.2 |
| 14d    | 0.1860     | 62.00    | 0.5480      | 182.67   | 0.5480 | 20160 | 9.9 |

Figure S1. The rate of release of GBE from Ch(GB)NPs in water, pH 7.0 (A) and in saline, pH 5.8 (during the first hour of release)

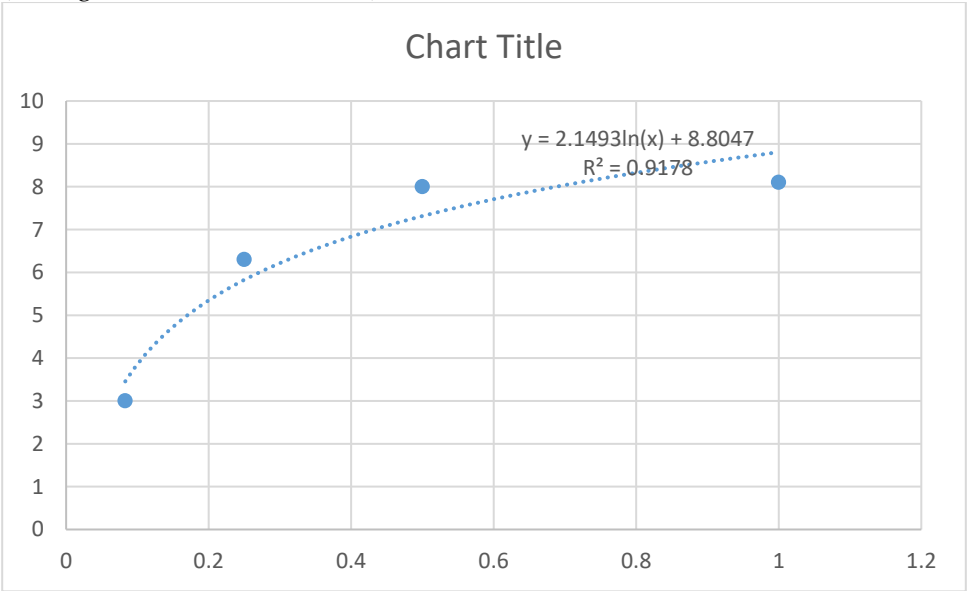

Table S2. Data for the rate of release of GBE from Ch(GB)NPs in water and in saline

| concentration, |         | concentration, |         |
|----------------|---------|----------------|---------|
| time, h        | µg/ml   | time, h        | µg/ml   |
|                |         | 0              |         |
| 0.083          | 0.00953 | 0.083          | 0.03377 |
| 0.25           | 0.01997 | 0.25           | 0.04233 |
| 0.5            | 0.02537 | 0.5            | 0.07323 |
| 1              | 0.0266  | 1              | 0.0713  |
| 2              | 0.02733 | 2              | 0.07813 |
| 4              | 0.02973 | 4              | 0.08067 |
| 24             | 0.03067 | 24             | 0.086   |
| 96             | 0.04367 | 96             | 0.09767 |
| 168            | 0.05    | 168            | 0.12    |

336

0.062

336

0.18267

Figure S2. The rate of release of GBE from Ch(GB)NPs in water, pH 7.0 (A) and in saline, pH 5.8

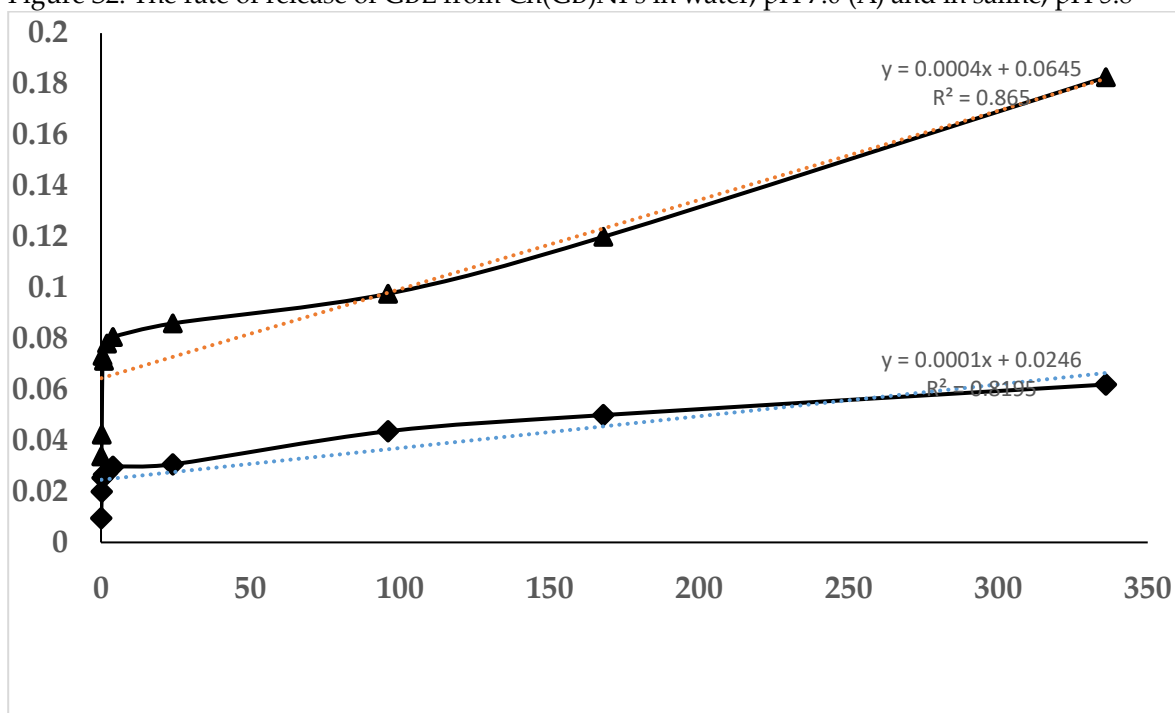

Figure S3. The rate of release of GBE from Ch(GB)NPs in water, pH 7.0 (A) and in saline, pH 5.8 (without the correction)

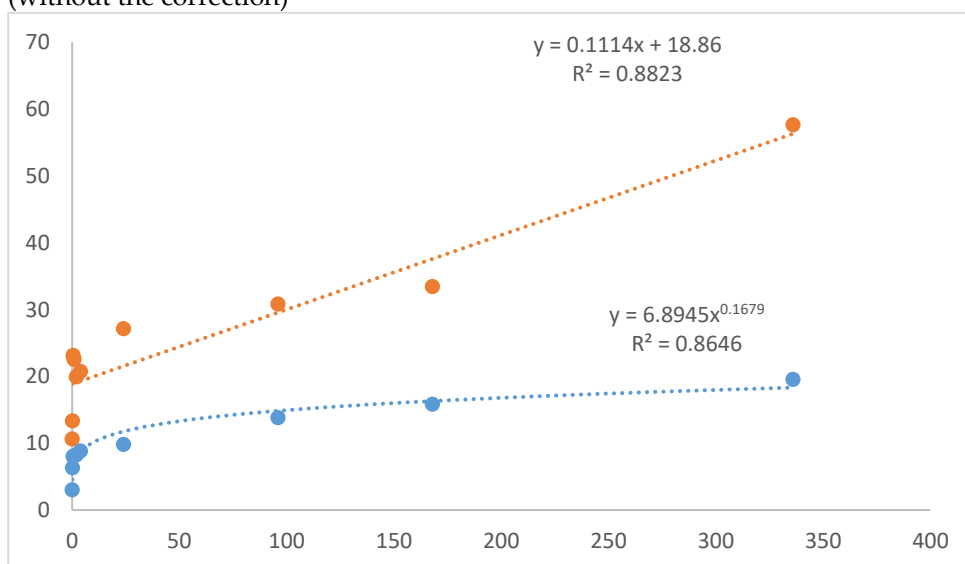

Table S3. Data for Higuchi model of GBE release in water and in saline

|      |     |      |
|------|-----|------|
| 0.29 | 3   | 10.6 |
| 0.5  | 6.3 | 13.3 |
| 0.71 | 8   | 23.1 |
| 1    | 8.1 | 22.5 |
| 1.41 | 8.2 | 19.9 |
| 2    | 8.8 | 20.7 |

|       |      |      |
|-------|------|------|
| 4.9   | 9.8  | 27.1 |
| 9.8   | 13.8 | 30.8 |
| 12.96 | 15.8 | 33.4 |
| 18.33 | 19.5 | 57.6 |

Figure S4. A plot of GBE release kinetics in water and in saline (Higuchi model)

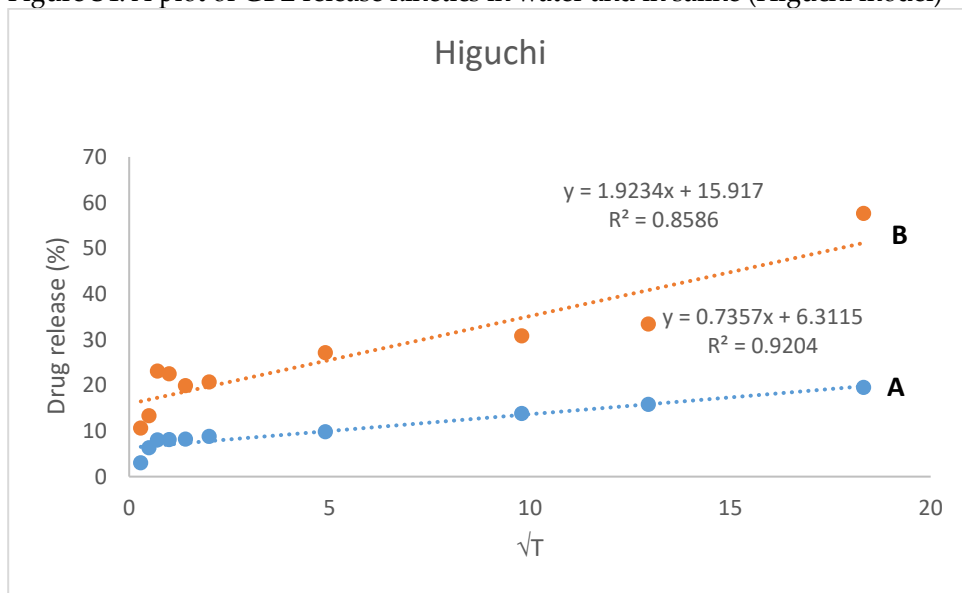

Table S4. Data for First order model of GBE release in water and in saline

|       |        |        |
|-------|--------|--------|
| 0.083 | -0.081 | -0.163 |
| 0.25  | -0.115 | -0.194 |
| 0.5   | -0.133 | -0.313 |
| 1     | -0.134 | -0.305 |
| 2     | -0.135 | -0.272 |
| 4     | -0.143 | -0.282 |
| 24    | -0.153 | -0.367 |
| 96    | -0.198 | -0.418 |
| 168   | -0.222 | -0.457 |
| 336   | -0.268 | -0.909 |

Figure S5. A plot of GBE release kinetics in water and in saline (First order model)

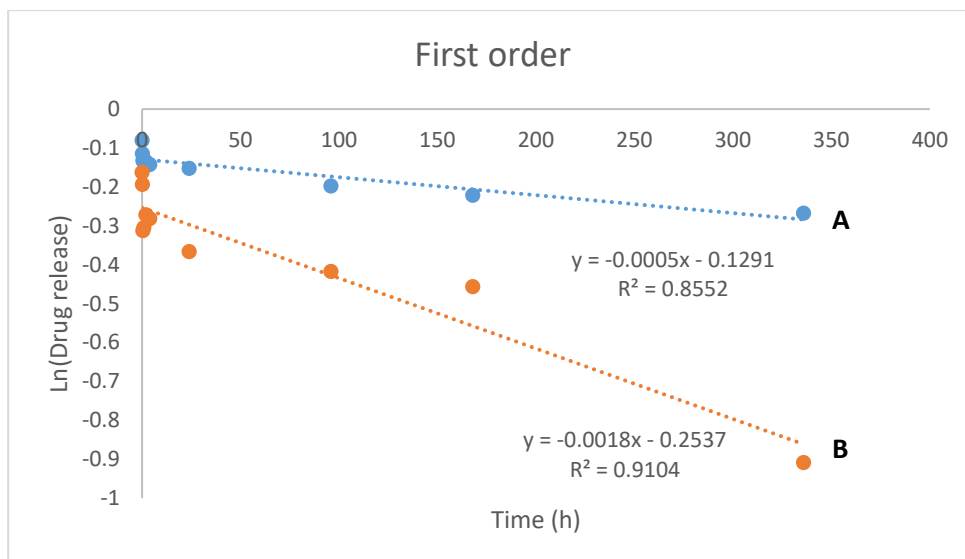

Table S5. Data for Zero order model of GBE release in water and in saline

|       |      |      |
|-------|------|------|
| 0.083 | 3    | 10.6 |
| 0.25  | 6.3  | 13.3 |
| 0.5   | 8    | 23.1 |
| 1     | 8.1  | 22.5 |
| 2     | 8.2  | 19.9 |
| 4     | 8.8  | 20.7 |
| 24    | 9.8  | 27.1 |
| 96    | 13.8 | 30.8 |
| 168   | 15.8 | 33.4 |
| 336   | 19.5 | 57.6 |

Figure S6. A plot of GBE release kinetics in water and in saline (Zero order model)

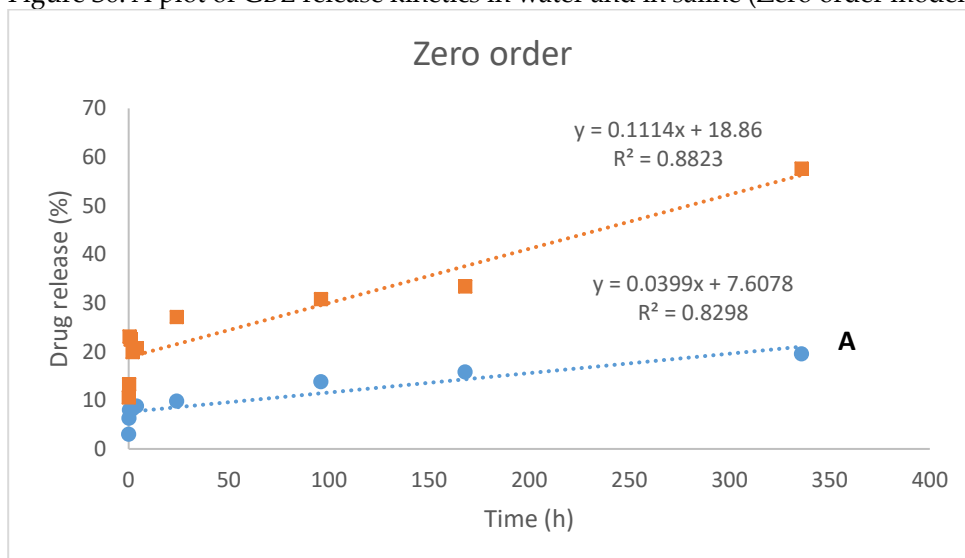

Table S6. Data for Korsmeyer-Peppas model of GBE release in water and in saline

|     |       |       |
|-----|-------|-------|
| 1.6 | -3.5  | -2.24 |
| 2.7 | -2.76 | -2.01 |

|     |       |       |
|-----|-------|-------|
| 3.4 | -2.5  | -1.46 |
| 4.1 | -2.52 | -1.49 |
| 4.8 | -2.51 | -1.61 |
| 5.5 | -2.42 | -1.57 |
| 7.3 | -2.32 | -1.3  |
| 8.6 | -1.98 | -1.18 |
| 9.2 | -1.85 | -1.09 |
| 9.9 | -1.63 | -0.55 |

Figure S7. A plot of GBE release kinetics in water and in saline (Korsmeyer-Peppas model)

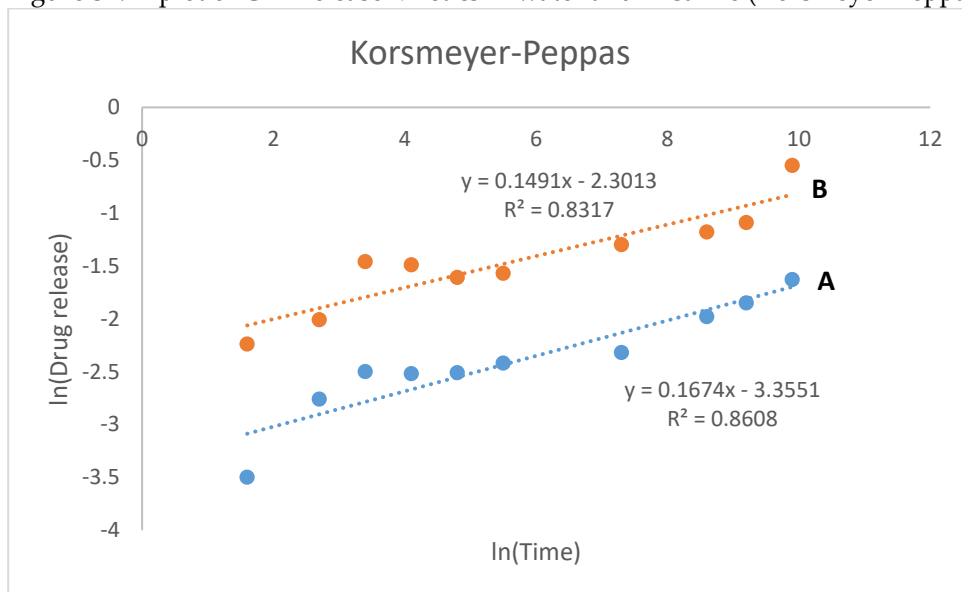

Supplement: s1 [file s1]
